# Supplementary material
Source: publisher site journal article supplement (http://www.degruyter.com/publication/journal_key/ILS/downloadAsset/ILS_Call%20for%20Papers%20-%20ILS%202018%20DWS.pdf)
Supplement: Supplementary file 1 [file ILS_Call%20for%20Papers%20-%20ILS%202018%20DWS.pdf]

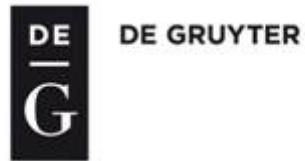

**Call for Papers!**  
**ISSUES IN LEGAL SCHOLARSHIP 2018**

**Editor: Dr. Charanjit Singh**  
**ISSN: 1539-8323**

**Published Worldwide by De Gruyter**  
**Call for Papers**

This call for papers is for submissions to the upcoming issue of the 'Issues in Legal Scholarship' journal that is due to publish in 2018.

This journal is peer reviewed and appears annually, and may be of interest to academic staff or postgraduates who are teaching/researching within the field of criminology, law or related sciences. The journal appears alongside all reputable Legal Journals online ensuring greater exposure for authors and the publication itself.

**About ILS**

Issues in Legal Scholarship (or "ILS") is a peer-reviewed journal that presents cutting-edge criminological, legal and policy research. Its purpose is to promote scholarly communication without regard to political or academic boundaries. The journal's emphasis on interdisciplinary work and legal theory extends to topics such as same-sex marriage, the reformation of American administrative law, and catastrophic risks. The journal seeks to address emerging issues of great significance, offering ongoing scholarship of interest to a wide range of readers. Online publication makes it possible for other researchers to find the best and latest quickly, as well as to join in further discussion.

The journal is edited by academics across the world ranging from the UK, Australia and faculty from the UC Berkeley Law School. Recent contributors include scholars from Harvard, Yale, Berkeley, Chicago, and Stanford.

ILS is essential reading for academics, legal professionals, criminologists, forensics experts, students and those working in the areas of evidence law. We encourage academics and students to submit book reviews that may be of interest to professionals within this discipline.

All submissions are via Scholar One (online). We aim to have an answer for you within 4 – 8 weeks. For submissions, manuscript guidelines and further information please see: <http://www.degruyter.com/view/j/ils>.

For further information please do contact me.

Contact address:

Dr. Charanjit Singh (Barrister)  
Head of the Department of Law and Finance

Email: [doctor.csingh@gmail.com](mailto:doctor.csingh@gmail.com) (Please insert 'ILS' in Subject Line)

---
